# Supplementary material for: Unlocking non-characteristic near-infrared emission of rare earth ions for photosynthetic bacteria cultivation and vein imaging applications
Source: Royal Society of Chemistry journal article supplement (doi:10.1039/d4tc02130d), 2024-01-01
Supplement: d4tc02130d1.pdf [file d4tc02130d1.pdf]

### Supporting information

Unlocking non-characteristic near-infrared emission of rare earth ions for photosynthetic bacteria cultivation and veins imaging applications

He Lin,<sup>a</sup> Shuangqiang Fang,<sup>\*a</sup> Tianchun Lang,<sup>b</sup> Jiali Yu,<sup>a</sup> Haoliang Cheng,<sup>a</sup> Jiaqi Ou,<sup>a</sup> Zhijie Ye,<sup>a</sup> Renjie Xu,<sup>a</sup> Xiulan Shui,<sup>a</sup> Haolin Qu,<sup>a</sup> Le Wang<sup>\*a</sup>

<sup>a</sup> College of Optical and Electronic Technology, China Jiliang University, Hangzhou 310018, China

<sup>b</sup> Chongqing Key Laboratory of Materials Surface & Interface Science, Research Institute for New Materials Technology, Chongqing University of Arts and Sciences, Chongqing 402160, China

Corresponding authors.

E-mail: fsq1025@163.com; calla@cjlu.edu.cn

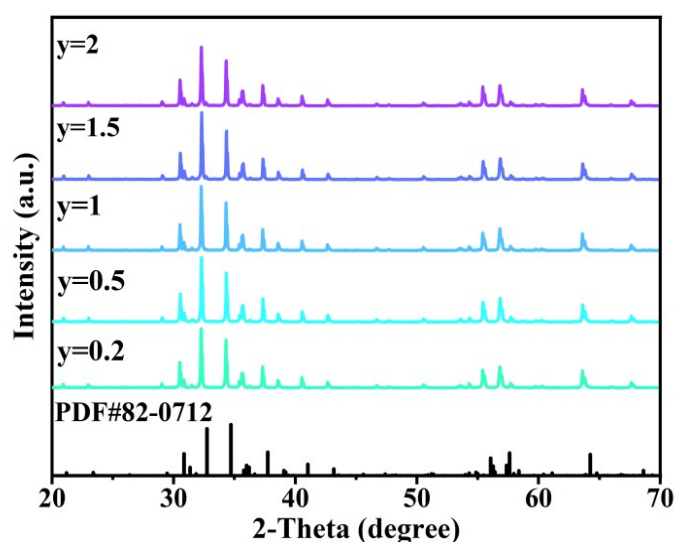

**Figure S1.** XRD patterns of SrGa<sub>11.91-y</sub>In<sub>y</sub>O<sub>19</sub>:7%Cr<sup>3+</sup>, 2%Tm<sup>3+</sup> (y = 0.2 - 2)

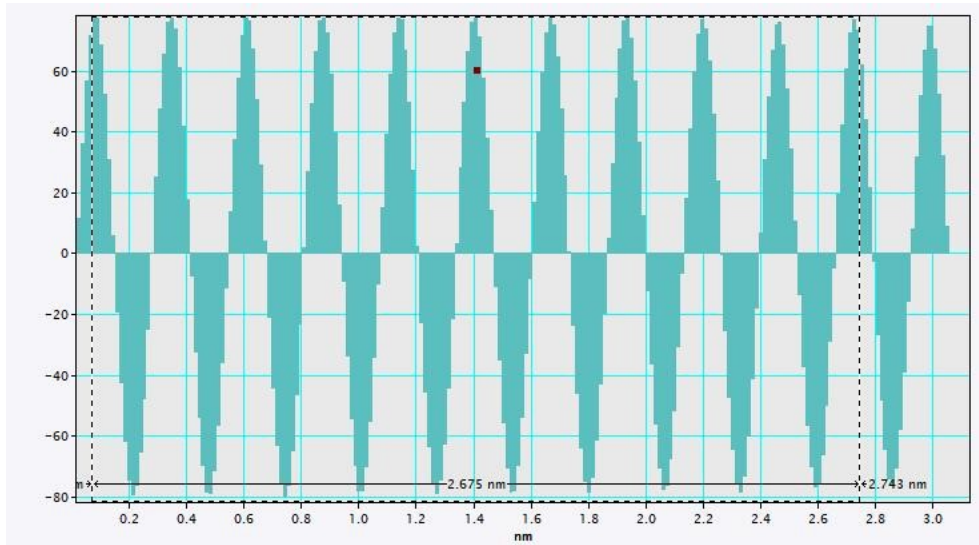

**Figure S2.** Lattice Stripes of  $\text{SrGa}_{10.91}\text{InO}_{19}:7\%\text{Cr}^{3+},2\%\text{Tm}^{3+}$ .

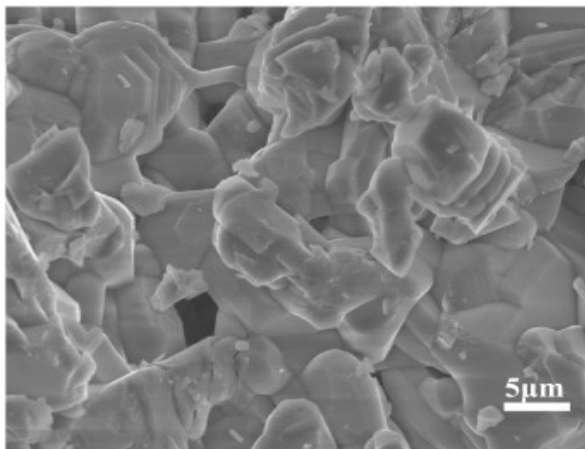

**Figure S3.** SEM image of  $\text{SrGa}_{10.91}\text{InO}_{19}:7\%\text{Cr}^{3+},2\%\text{Tm}^{3+}$ .

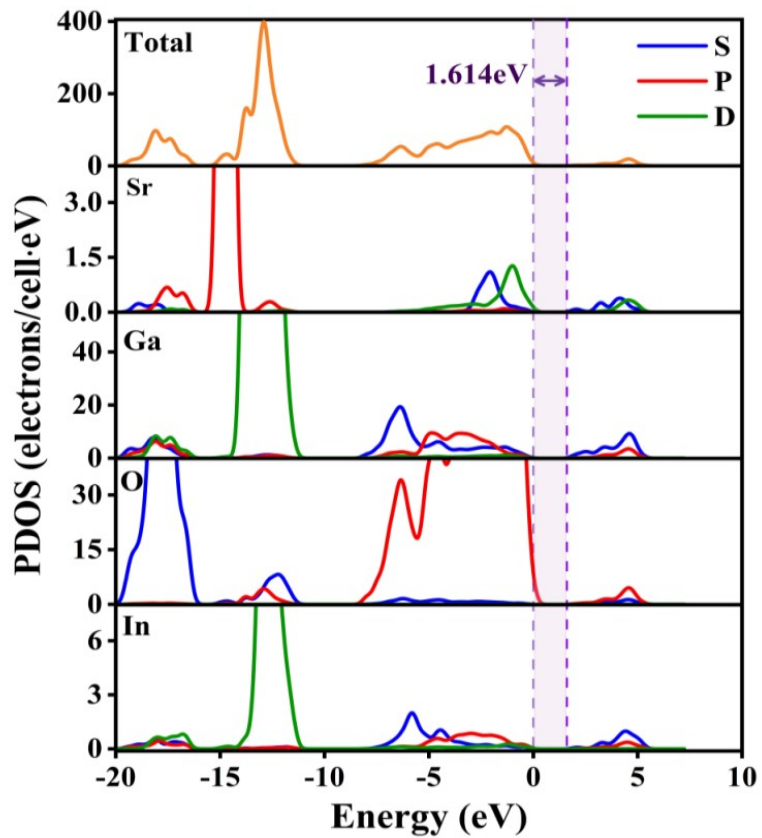

**Figure S4.** The total density of states(T-DOS), and partial density of states (P-DOS) of the SrGa<sub>11</sub>InO<sub>19</sub>.

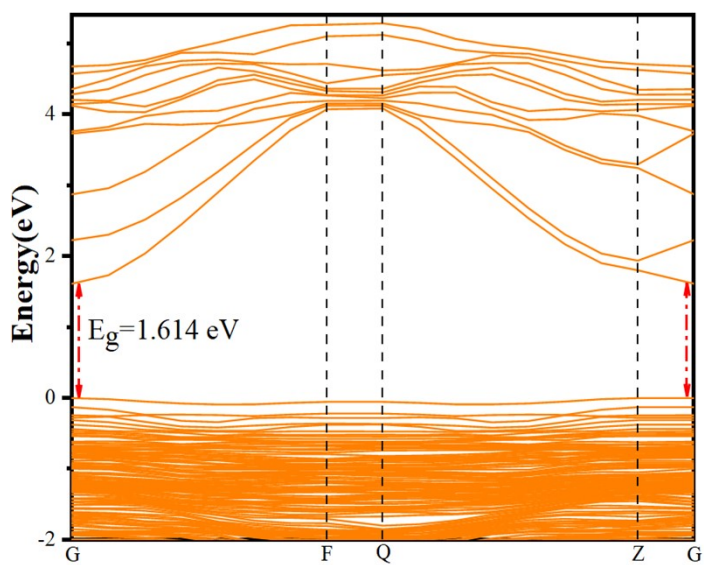

**Figure S5.** The band structure of SrGa<sub>11</sub>InO<sub>19</sub>

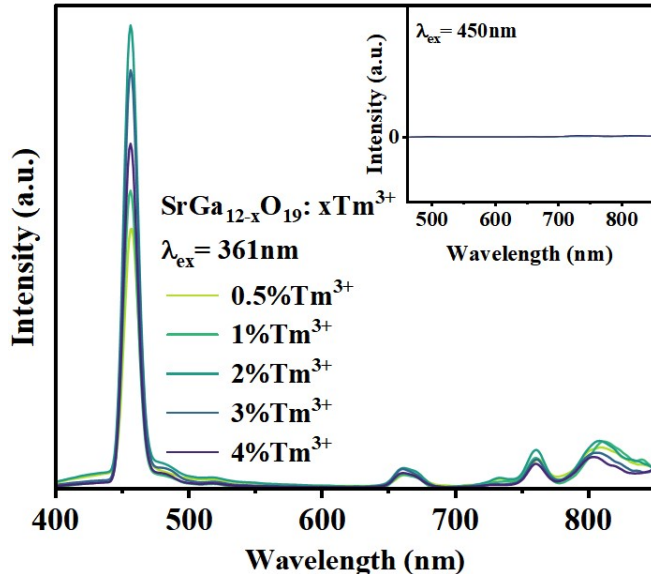

**Figure S6.** PL spectra of  $\text{SrGa}_{12-x}\text{O}_{19}:x\text{Tm}^{3+}$  ( $x = 0.5\% - 4\%$ ), the inset shows the PL spectrum under 450 nm excitation.

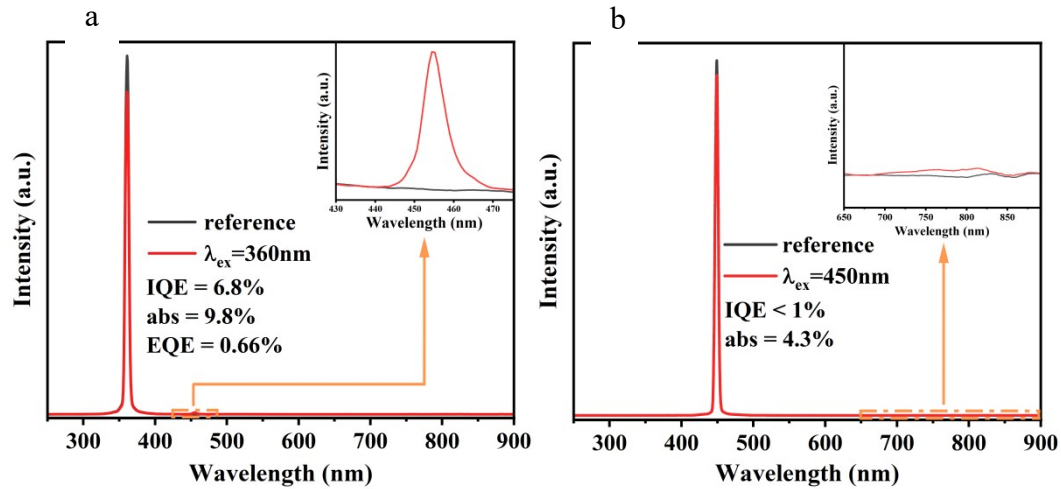

**Figure S7. a**、QE measurement of  $\text{SrGa}_{11.98}\text{O}_{19}:2\%\text{Tm}^{3+}$  excited at 360 nm. **b**、QE measurement of  $\text{SrGa}_{11.98}\text{O}_{19}:2\%\text{Tm}^{3+}$  excited at 450 nm

IQE represents the ratio between emitted and absorbed photons, while EQE signifies the ratio between emitted photons and the total photons stimulated by the light source. Meanwhile, absorption efficiency ( $\alpha_{\text{Abs}}$ ) reflects the proportion of absorbed photons in the sample compared to the total photons stimulated by the light source. This connection between IQE, EQE, and  $\alpha_{\text{Abs}}$  can be mathematically expressed as follows:<sup>1</sup>

$$IQE = \frac{\int E_{\text{em}S} - \int E_{\text{em}B}}{\int E_{\text{ex}B} - \int E_{\text{ex}S}} \times 100\% \quad (1)$$

$$EQE = \frac{\int E_{emS} - \int E_{emB}}{\int E_{exB}} \times 100\% \quad (2)$$

$$\alpha_{abs} = \frac{\alpha}{\delta} = \frac{\int E_{exB} - \int E_{exS}}{\int E_{exB}} \times 100\% \quad (3)$$

$$EQE = IQE \times \alpha_{abs} \quad (4)$$

where  $\delta$  is the number of total photons excited by the light source and  $\alpha$  is the number of photons absorbed by the sample.  $E_{exB}$  is the spectrum of the excitation light with BaSO<sub>4</sub> reference material in the sphere;  $E_{exS}$  is the spectrum of the excitation light with the sample in the sphere;  $E_{emB}$  is the spectrum of the emission light with the BaSO<sub>4</sub> in the sphere, and  $E_{emS}$  is the spectrum of the emission light with the sample in the sphere.

In the above-mentioned equations,  $\delta$  represents the total number of photons stimulated by the light source, while  $\alpha$  stands for the number of photons absorbed by the sample. Additionally,  $E_{exB}$  refers to the excitation light spectrum with BaSO<sub>4</sub> as the reference material within the sphere,  $E_{exS}$  represents the spectrum of the excitation light when the sample is placed inside the sphere, and  $E_{emB}$  signifies the spectrum of the emitted light with BaSO<sub>4</sub> located in the sphere. Finally,  $E_{emS}$  is the spectrum of the emitted light when the sample is placed inside the sphere.

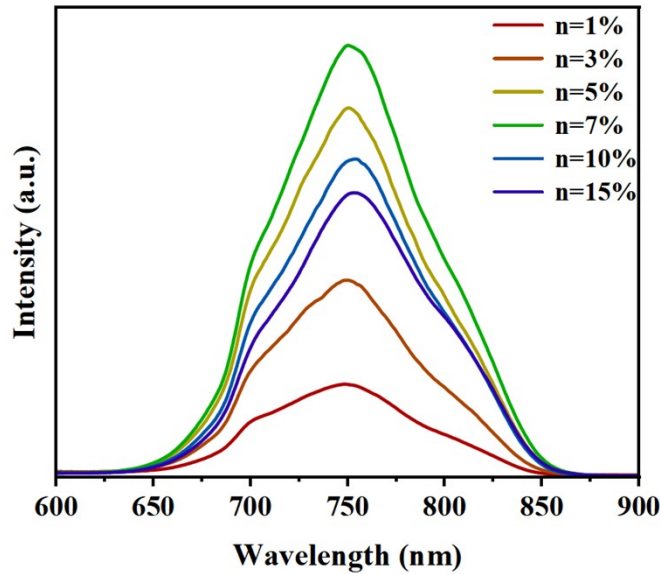

**Figure S8.** PL spectra of SrGa<sub>12-n</sub>O<sub>19</sub>:nCr<sup>3+</sup> (n = 1% - 15%).

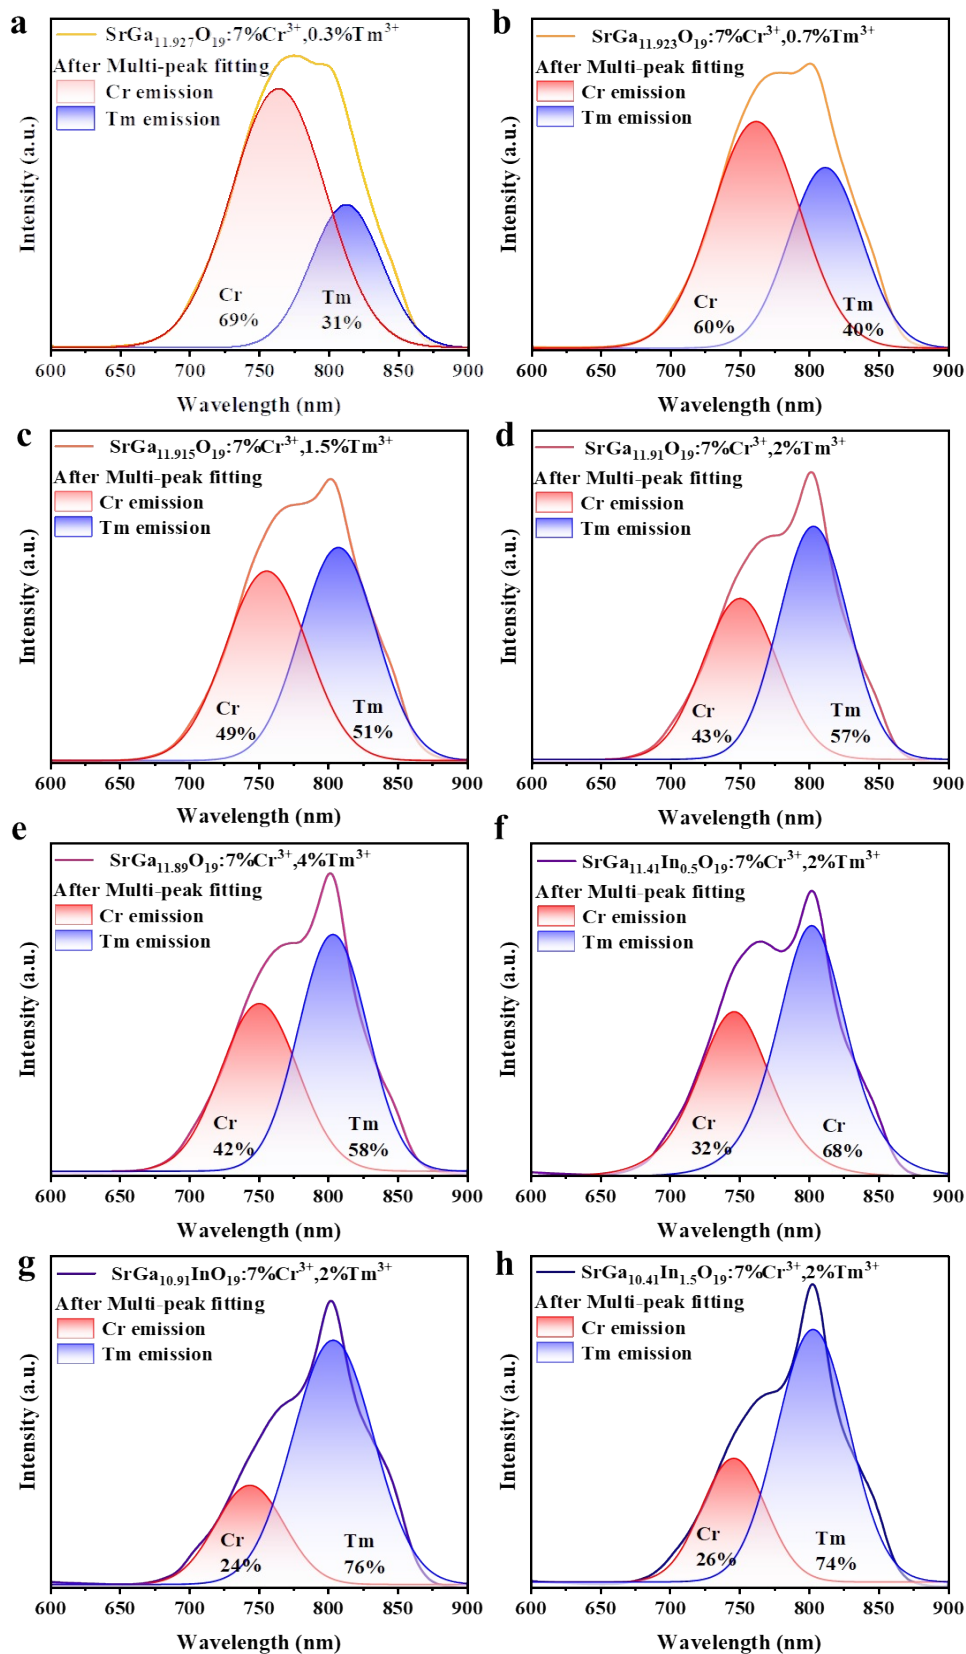

**Figure S9.** The ratio of Cr<sup>3+</sup> and Tm<sup>3+</sup> occupying the emission spectrum was calculated after multi-peak fitting of the emission spectra; a – e: SrGa<sub>12-x</sub>O<sub>19</sub>:7%Cr<sup>3+</sup>,x%Tm<sup>3+</sup>, f - h: SrGa<sub>11.91-y</sub>In<sub>y</sub>O<sub>19</sub>:7%Cr<sup>3+</sup>,2%Tm<sup>3+</sup>

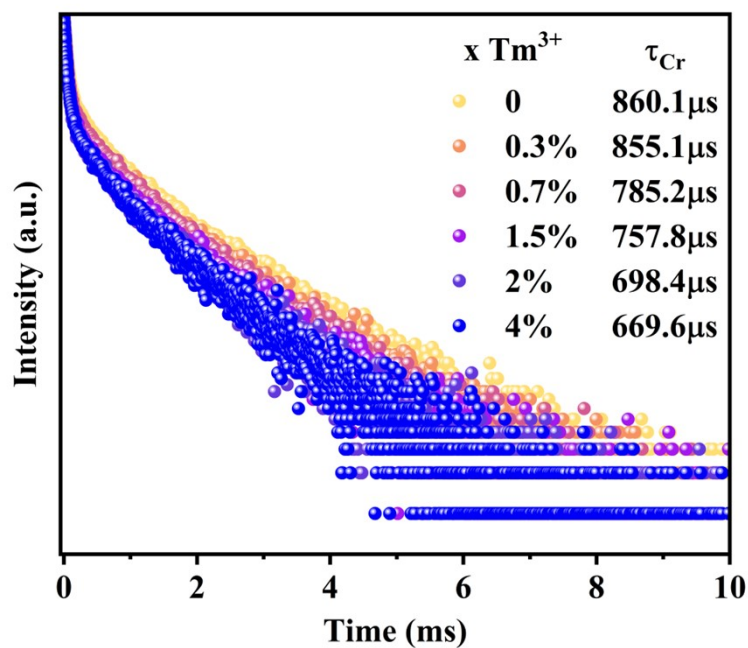

**Figure S10.** Decay curves of Cr<sup>3+</sup> in SrGa<sub>11.93-x</sub>O<sub>19</sub>:7%Cr<sup>3+</sup>,xTm<sup>3+</sup> (x = 0.3% - 4%) phosphors monitored at 740 nm with different Tm<sup>3+</sup> concentration.

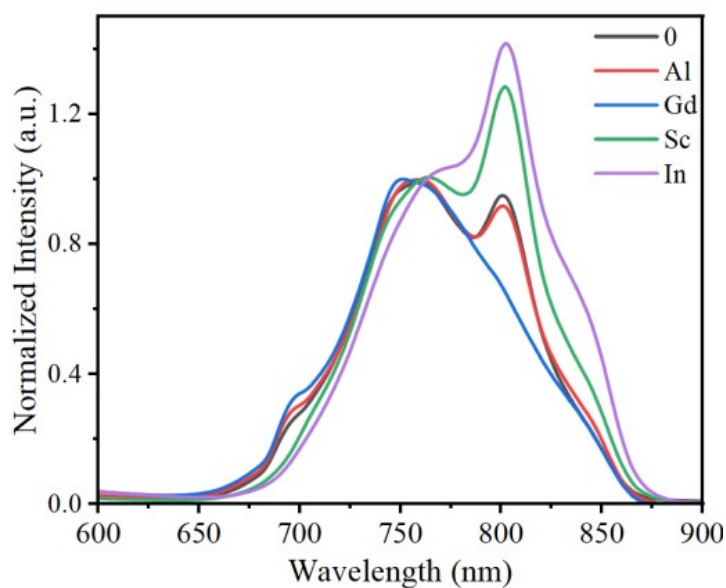

**Figure S11.** Normalized PL spectra of SrGa<sub>10.91</sub>XO<sub>19</sub>:7%Cr<sup>3+</sup>,2%Tm<sup>3+</sup> (X = Al<sup>3+</sup>, Gd<sup>3+</sup>, Sc<sup>3+</sup>, In<sup>3+</sup>).

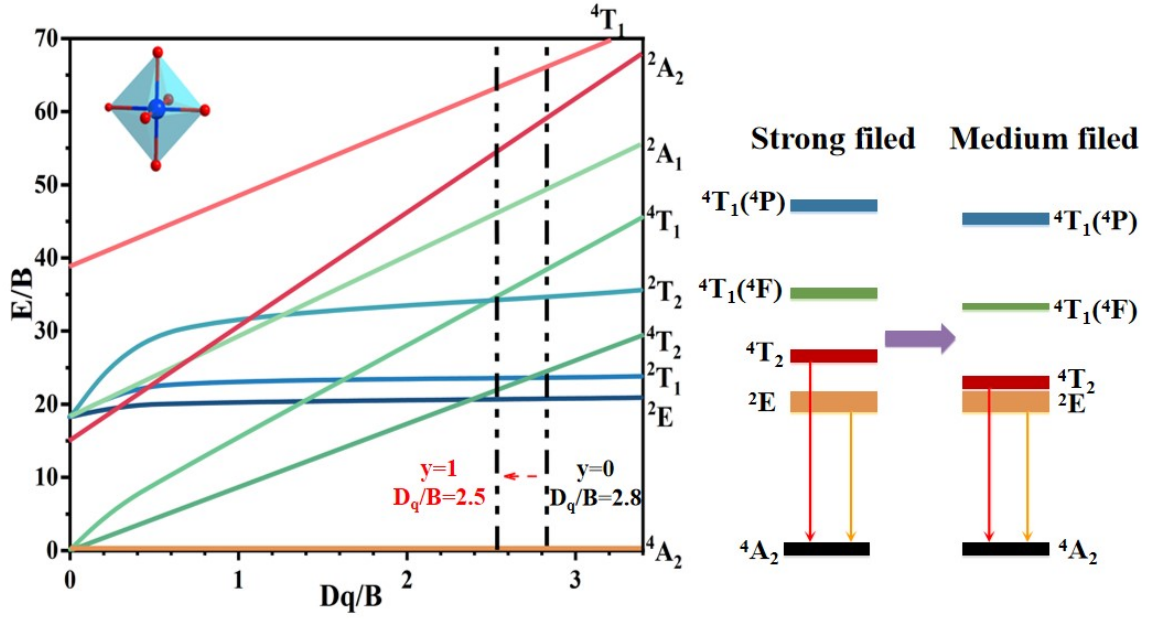

**Figure S12.** Tanabe-Sugano diagram of  $\text{Cr}^{3+}$  at an octahedron crystal environment dependence of emission spectra on  $\text{In}^{3+}$  concentration in  $\text{SrGa}_{11.91-y}\text{In}_y\text{O}_{19}:7\%\text{Cr}^{3+},2\%\text{Tm}^{3+}$  ( $y = 0, 1$ )

The crystal field intensity of  $\text{SrGa}_{11.91-y}\text{In}_y\text{O}_{19}:7\%\text{Cr}^{3+},2\%\text{Tm}^{3+}$  can be quantified employing the crystal field parameter  $D_q/B$  within the Tanabe-Sugano diagram.<sup>2</sup>

$$D_q = \frac{E(^4A_2 \rightarrow ^4T_2)}{10} \quad (5)$$

$$m = \frac{E(^4A_2 \rightarrow ^4T_1) - E(^4A_2 \rightarrow ^4T_2)}{D_q} \quad (6)$$

$$D_q / B = \frac{15(m - 8)}{m^2 - 10m} \quad (7)$$

Where  $D_q$  represents the crystal field parameters, and  $B$  corresponds to the Racah parameters.  $E(^4A_2 \rightarrow ^4T_1)$  and  $E(^4A_2 \rightarrow ^4T_2)$  denote the equilibrium positions of the excitation bands corresponding to the  $^4T_1$  and  $^4T_2$  energy levels, respectively. The computed values of  $D_q$  and  $B$  are approximately 1644 and 580  $\text{cm}^{-1}$  for  $y=0$  and around 1605 and 634  $\text{cm}^{-1}$  for  $y=1$ . The resultant  $D_q/B$  ratios are 2.8 and 2.5, indicating a weakening of the crystal field.



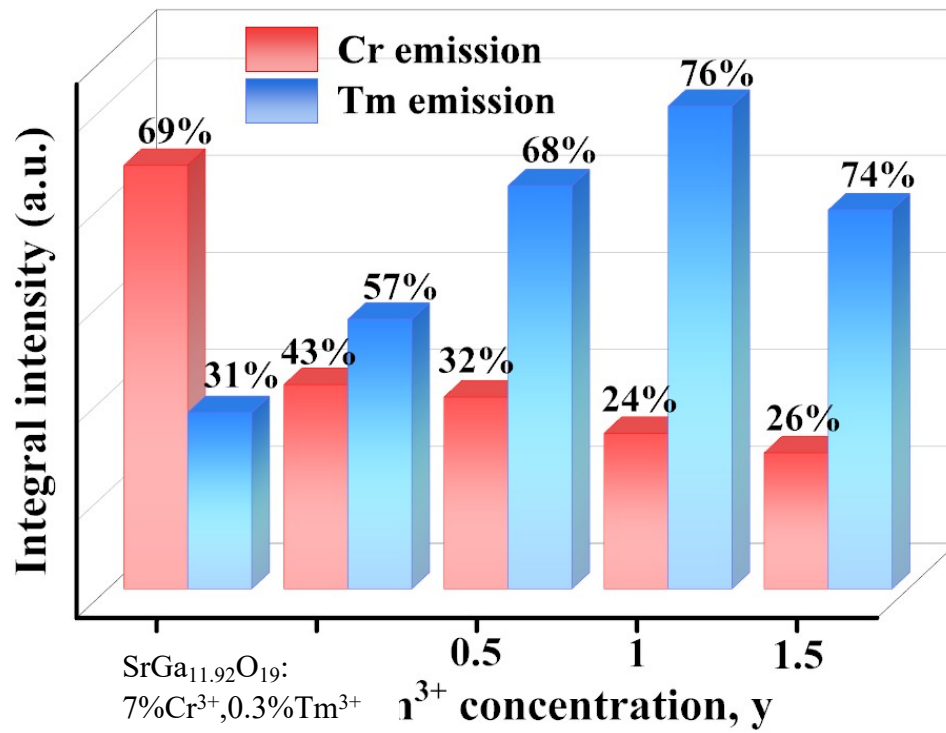

**Figure S13.** Ratio of the integrated intensity of Tm<sup>3+</sup> emission to that of Cr<sup>3+</sup> emission after In<sup>3+</sup> introduction

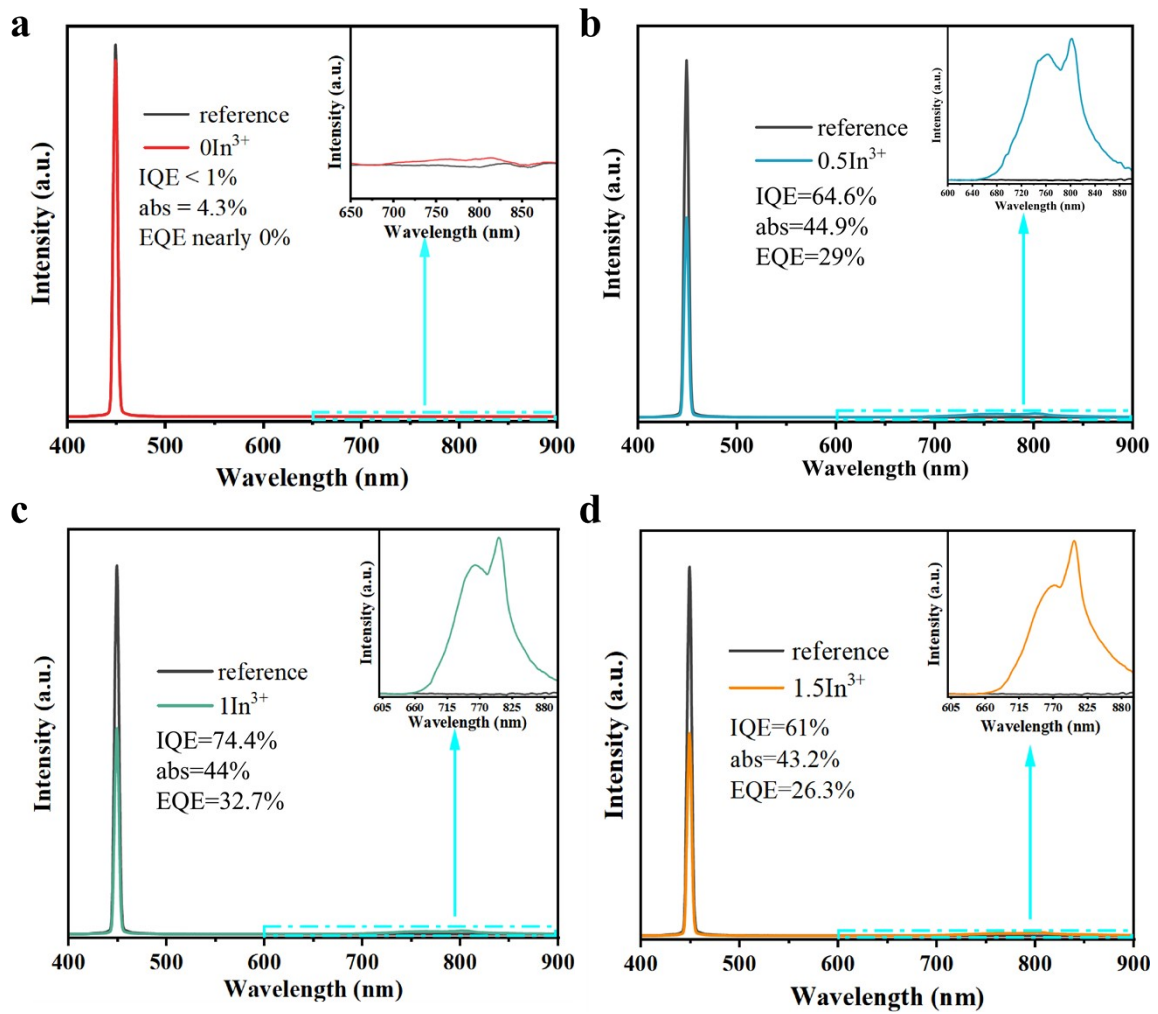

**Figure S14.** QE measurement of a)  $\text{SrGa}_{11.98}\text{O}_{19}:2\%\text{Tm}^{3+}$ , b)  $\text{SrGa}_{11.41}\text{In}_{0.5}\text{O}_{19}:7\%\text{Cr}^{3+}, 2\%\text{Tm}^{3+}$ , c)  $\text{SrGa}_{10.91}\text{InO}_{19}:7\%\text{Cr}^{3+}, 2\%\text{Tm}^{3+}$  and d)  $\text{SrGa}_{10.41}\text{In}_{1.5}\text{O}_{19}:7\%\text{Cr}^{3+}, 2\%\text{Tm}^{3+}$  excited at 450 nm.

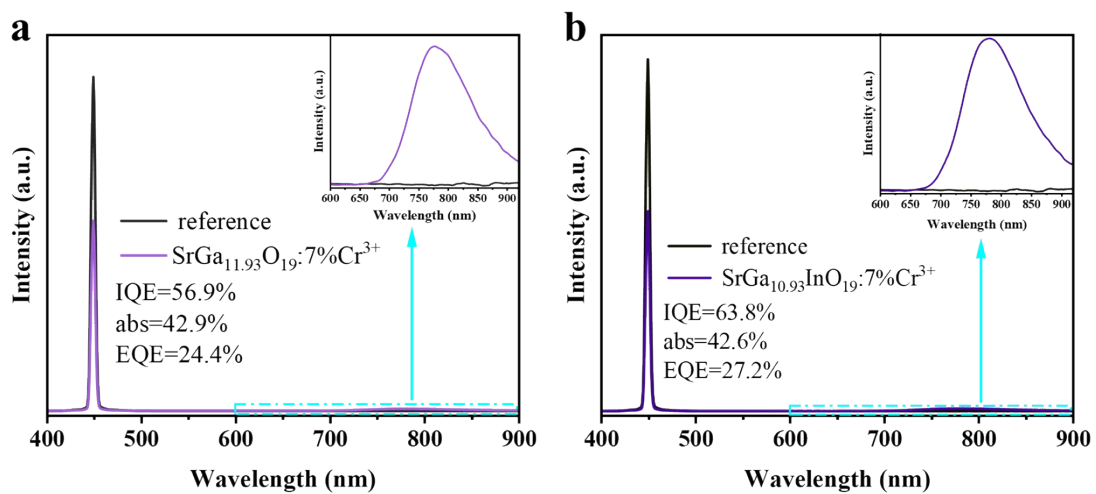

**Figure S15.** QE measurement of a)  $\text{SrGa}_{11.93}\text{O}_{19}:7\%\text{Cr}^{3+}$ , b)  $\text{SrGa}_{10.93}\text{InO}_{19}:7\%\text{Cr}^{3+}$  excited at 450 nm.

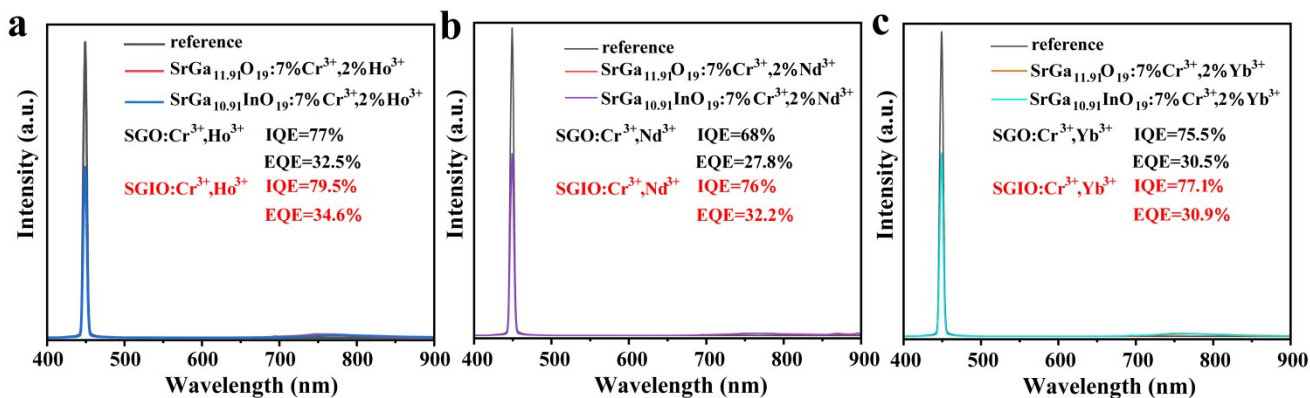

**Figure S16. a)** QE measurement of SrGa<sub>11.91</sub>O<sub>19</sub>:7%Cr<sup>3+</sup>,2%Ho<sup>3+</sup> and SrGa<sub>10.91</sub>InO<sub>19</sub>:7%Cr<sup>3+</sup>,2%Ho<sup>3+</sup> excited at 450 nm. **b)** QE measurement of SrGa<sub>11.91</sub>O<sub>19</sub>:7%Cr<sup>3+</sup>,2%Nd<sup>3+</sup> and SrGa<sub>10.91</sub>InO<sub>19</sub>:7%Cr<sup>3+</sup>,2%Nd<sup>3+</sup> excited at 450 nm. **c)** QE measurement of SrGa<sub>11.91</sub>O<sub>19</sub>:7%Cr<sup>3+</sup>,2%Yb<sup>3+</sup> and SrGa<sub>10.91</sub>InO<sub>19</sub>:7%Cr<sup>3+</sup>,2%Yb<sup>3+</sup> excited at 450 nm.

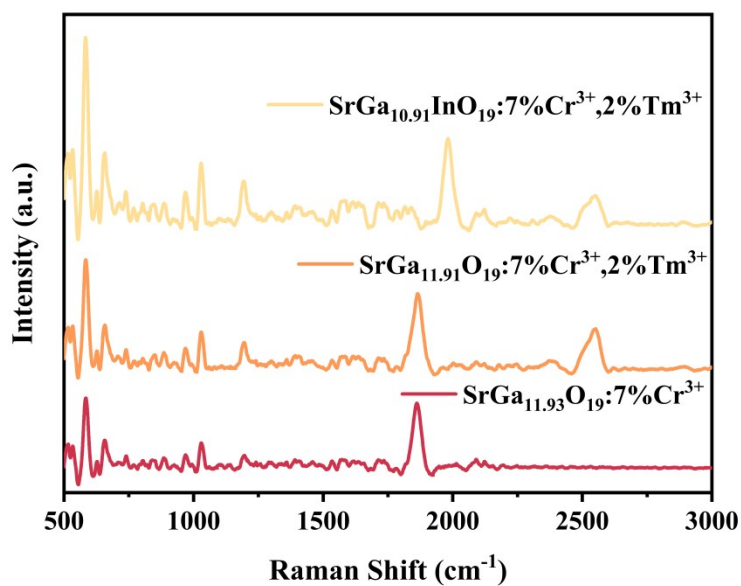

**Figure S17.** Raman spectrum of SrGa<sub>11.93</sub>O<sub>19</sub>:7%Cr<sup>3+</sup>, SrGa<sub>11.91</sub>O<sub>19</sub>:7%Cr<sup>3+</sup>,2%Tm<sup>3+</sup> and SrGa<sub>10.91</sub>InO<sub>19</sub>:7%Cr<sup>3+</sup>,2%Tm<sup>3+</sup>

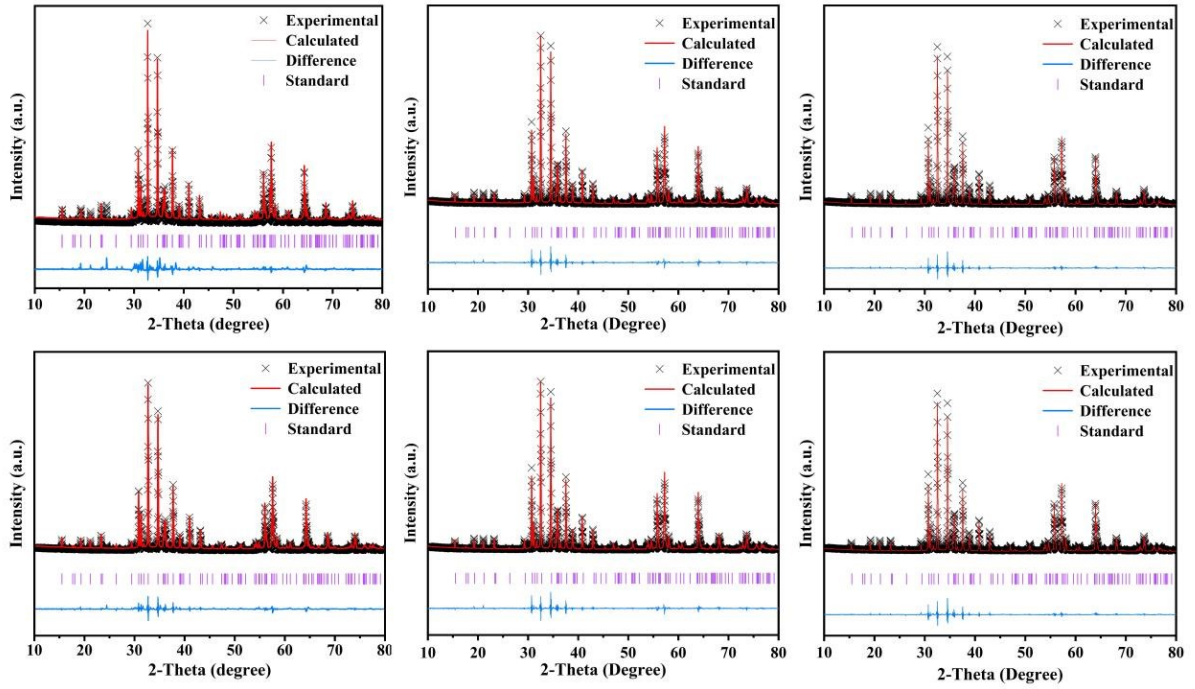

**Figure S18.** Rietveld refinements results of the  $\text{SrGa}_{11.93-x}\text{O}_{19}:7\%\text{Cr}^{3+},x\text{Tm}^{3+}$  ( $x = 0.3\% - 4\%$ ) and  $\text{SrGa}_{11.91-y}\text{In}_y\text{O}_{19}:7\%\text{Cr}^{3+},2\%\text{Tm}^{3+}$  ( $y = 0.5 - 1.5$ )

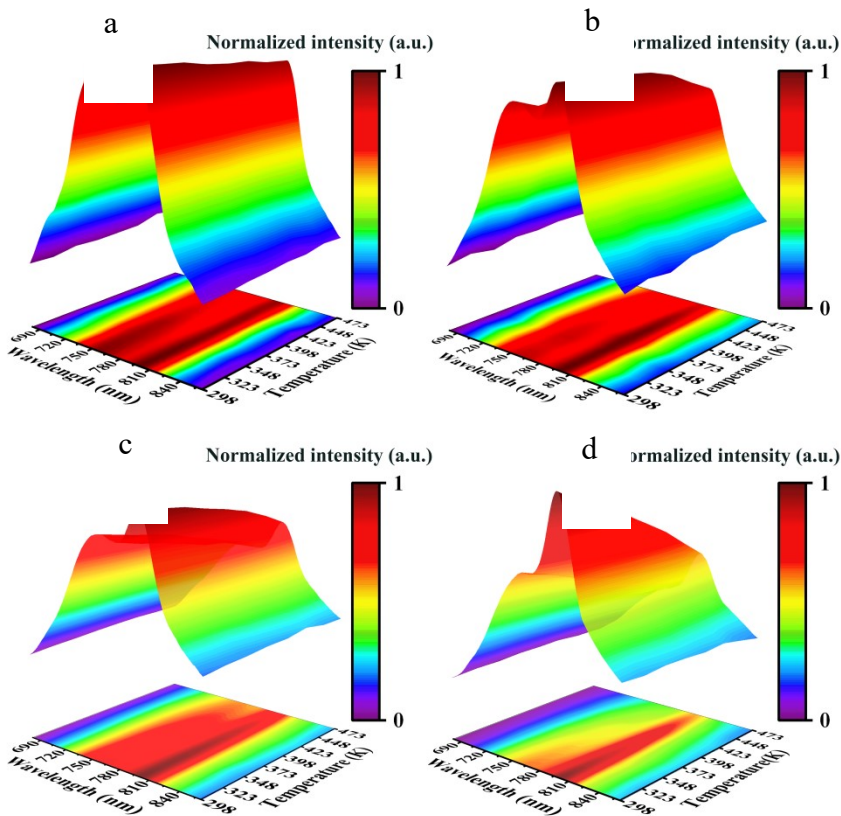

**Figure S19. a - d,** The 3D temperature-dependent PL spectra of  $\text{SrGa}_{11.91-y}\text{In}_y\text{O}_{19}:7\%\text{Cr}^{3+},2\%\text{Tm}^{3+}$  phosphors

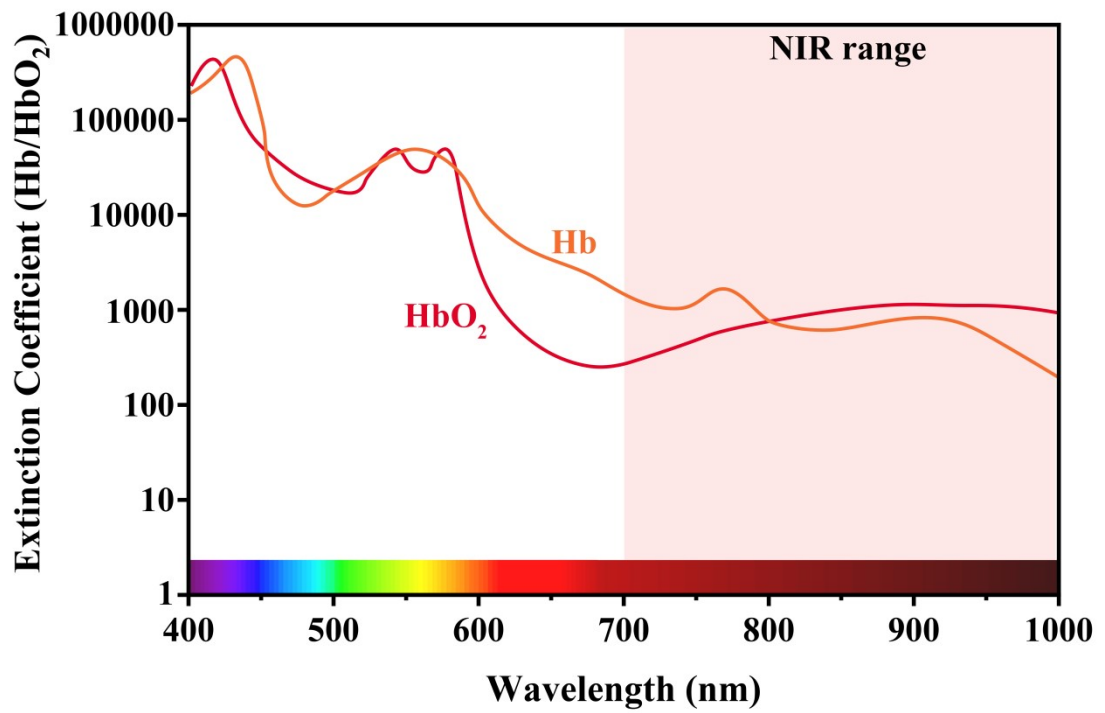

Figure S20. The absorption spectrum of human blood vessels.

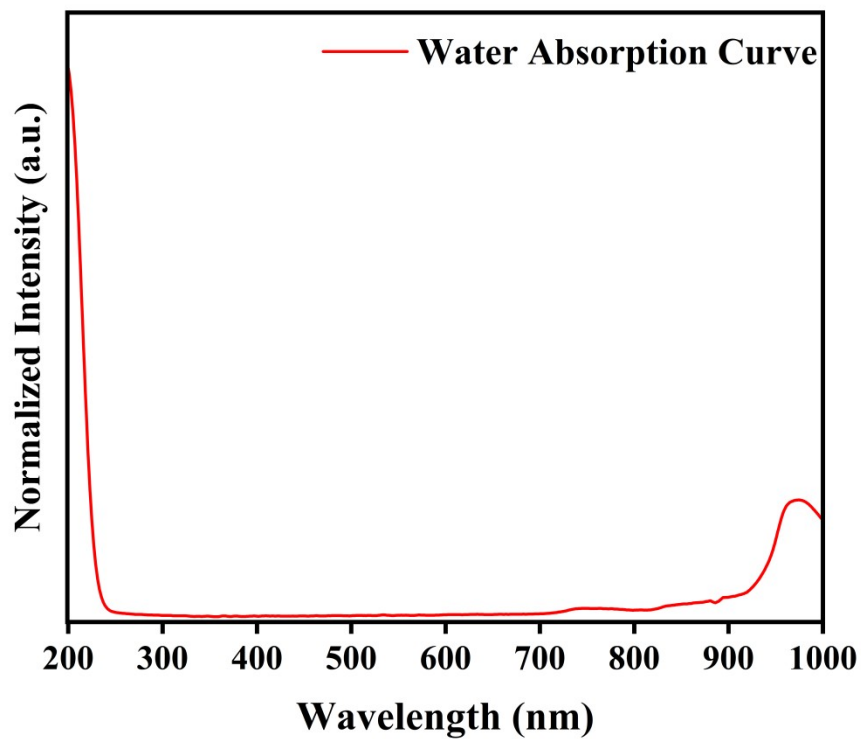

Figure S21. The absorption spectrum of water.

**Table S1** Atom preferential site occupancies of  $\text{In}^{3+}$  and  $\text{Tm}^{3+}$  ions by utilizing Rietveld refinement for the representative  $\text{SrGa}_{10.91}\text{InO}_{19}:7\%\text{Cr}^{3+},2\%\text{Tm}^{3+}$  phosphor.

|   | Atom | x     | y     | z     | Occ.  |
|---|------|-------|-------|-------|-------|
| 1 | Sr   | 0.333 | 0.666 | 0.745 | 1     |
| 2 | GaI  | 0.000 | 0.000 | 0.249 | 0.453 |
| 3 | GaII | 0.333 | 0.666 | 0.182 | 0.8   |
| 4 | InI  | 0.000 | 0.000 | 0.215 | 0.028 |
| 5 | InII | 0.333 | 0.666 | 0.178 | 0.13  |
| 6 | TmI  | 0.000 | 0.000 | 0.216 | 0.019 |
| 7 | TmII | 0.333 | 0.666 | 0.185 | 0.07  |

**Table S2** Elemental content of  $\text{Tm}^{3+}$  and  $\text{In}^{3+}$  in  $\text{SrGa}_{11.91}\text{O}_{19}:7\%\text{Cr}^{3+},2\%\text{Tm}^{3+}$ ,  $\text{SrGa}_{11.41}\text{In}_{0.5}\text{O}_{19}:7\%\text{Cr}^{3+},2\%\text{Tm}^{3+}$ , and  $\text{SrGa}_{10.91}\text{InO}_{19}:7\%\text{Cr}^{3+},2\%\text{Tm}^{3+}$  samples by ICP-OES.

| Test Element     | Mole Ratio | Sample Weight (g) | Sample Content (mg/kg) | Elemental Sample Content (%) | Elemental |
|------------------|------------|-------------------|------------------------|------------------------------|-----------|
| $\text{Tm}^{3+}$ | 2%         | 0.037             | 1836.94                | 0.184                        |           |
|                  | 2%         | 0.036             | 2066.44                | 0.207                        |           |
|                  | 2%         | 0.037             | 2564.86                | 0.256                        |           |
| $\text{In}^{3+}$ | 0          | 0.037             | 13.85                  | 0.002                        |           |
|                  | 0.5        | 0.036             | 39260.27               | 3.926                        |           |
|                  | 1          | 0.037             | 80236.49               | 8.024                        |           |

**Table S3** Refined bond lengths for the SrGa<sub>11.91</sub>O<sub>19</sub>:7%Cr<sup>3+</sup>,2%Tm<sup>3+</sup> and SrGa<sub>10.91</sub>InO<sub>19</sub>:7%Cr<sup>3+</sup>,2%Tm<sup>3+</sup> samples

| Bond length (Å) | SrGa <sub>11.91</sub> O <sub>19</sub> :7%Cr <sup>3+</sup> ,2%Tm <sup>3+</sup> | SrGa <sub>10.91</sub> InO <sub>19</sub> :7%Cr <sup>3+</sup> ,2%Tm <sup>3+</sup> |
|-----------------|-------------------------------------------------------------------------------|---------------------------------------------------------------------------------|
| Ga-O1           | 1.85                                                                          | 1.98                                                                            |
| Ga-O2           | 1.83                                                                          | 2.01                                                                            |
| Ga-O3           | 1.91                                                                          | 1.84                                                                            |
| Ga-O4           | 2.12                                                                          | 2.18                                                                            |
| Ga-O5           | 1.73                                                                          | 1.75                                                                            |
| Ga-O6           | 1.9                                                                           | 1.86                                                                            |
| Tm1-Ga          | 2.69                                                                          | 2.63                                                                            |
| Tm1-O3          | 1.75                                                                          | 1.56                                                                            |
| Tm2-O3          | 2.01                                                                          | 2.08                                                                            |
| Tm2-O5          | 2.13                                                                          | 2.33                                                                            |

**Table S4** Refined bond angles for the SrGa<sub>11.91</sub>O<sub>19</sub>:7%Cr<sup>3+</sup>,2%Tm<sup>3+</sup> and SrGa<sub>10.91</sub>InO<sub>19</sub>:7%Cr<sup>3+</sup>,2%Tm<sup>3+</sup> samples

| Band angle (°) | SrGa <sub>11.91</sub> O <sub>19</sub> :7%Cr <sup>3+</sup> ,2%Tm <sup>3+</sup> | SrGa <sub>10.91</sub> InO <sub>19</sub> :7%Cr <sup>3+</sup> ,2%Tm <sup>3+</sup> |
|----------------|-------------------------------------------------------------------------------|---------------------------------------------------------------------------------|
| Ga1-O1-O1      | 101                                                                           |                                                                                 |
| Ga1-O8-O1      | 83.1                                                                          | 112.5                                                                           |
| Ga2-O2-O2      | 96.7                                                                          | 118.9                                                                           |
| Ga3-O4-O4      | 93.5                                                                          | 84.5                                                                            |
| Ga4-O5-O5      | 119.8                                                                         | 119.9                                                                           |
| Ga4-O7-O5      | 92.3                                                                          | 87.9                                                                            |
| Ga5-O4-O4      |                                                                               | 120                                                                             |
| Ga5-Tm2-O4     |                                                                               | 90.8                                                                            |
| Ga6-O1-O1      |                                                                               | 106.6                                                                           |
| Ga7-O3-O3      | 115.6                                                                         | 96.1                                                                            |
| Tm1-O3-O3      |                                                                               | 85.5                                                                            |
|                | 86.7                                                                          |                                                                                 |
| Tm2-O7-Ga5     |                                                                               | 180                                                                             |

|           |       |       |
|-----------|-------|-------|
| Tm2-O3-O3 |       | 73.2  |
|           | 89.1  |       |
| Tm2-O5-O5 |       | 112   |
|           | 109.7 |       |
| Tm2-O7-O4 |       | 106.8 |

**Table S5** Refined results of SrGa<sub>11.93-x</sub>O<sub>19</sub>: 7%Cr<sup>3+</sup>,xTm<sup>3+</sup> (x = 0.3% - 4%) and SrGa<sub>11.91-y</sub>In<sub>y</sub>O<sub>19</sub>: 7%Cr<sup>3+</sup>,2%Tm<sup>3+</sup> (y = 0.5 - 1.5) phosphor

| Samples                                                                                             | Volume (Å <sup>3</sup> ) | Tm-O <sub>3</sub> ,O <sub>5</sub> bond angle (°) | Tm-O bond length (ave Å) | Rwp, Rp, $\chi^2$ (%) |                  |
|-----------------------------------------------------------------------------------------------------|--------------------------|--------------------------------------------------|--------------------------|-----------------------|------------------|
| SrGa <sub>11.93-x</sub> O <sub>19</sub> :<br>7%Cr <sup>3+</sup> ,xTm <sup>3+</sup>                  | 0.3 %                    | 662.985                                          | 95.3, 105.7              | 1.937145              | 9.82, 8.83, 2.14 |
|                                                                                                     | 0.7 %                    | 662.747                                          | 96.5, 103.1              | 1.937329              | 9.48, 8.68, 2.07 |
|                                                                                                     | 1.5 %                    | 662.779                                          | 94.5, 103.5              | 1.937837              | 9.55, 8.78, 2.37 |
| SrGa <sub>11.91-y</sub> In <sub>y</sub> O <sub>19</sub> :<br>7%Cr <sup>3+</sup> ,2%Tm <sup>3+</sup> | 4%                       | 662.934                                          | 94.1, 102.9              | 1.937964              | 9.96, 8.87, 3.52 |
|                                                                                                     | 0.5                      | 672.833                                          | 91.3, 110.8              | 2.001681              | 7.29, 7.15, 2.67 |
|                                                                                                     | 1.5                      | 674.856                                          | 89.9,115                 | 2.030385              | 8.38, 8.53, 3.56 |

#### Ethics statement

This study adheres to the principles outlined in the Declaration of Helsinki concerning medical research ethics. Prior to the commencement of the study, venous imaging participants were fully informed about the study's purpose, procedures, potential risks, and benefits. Informed consent was obtained from all participants, who agreed to participate in the study and to the publication of the study results. Throughout the study, all collected participant information was treated with strict confidentiality and used solely for the purposes of this research, ensuring the privacy and data security of the participants.

#### Reference

- 1 J. Qiao, S. Zhang, X. Zhou, W. Chen, R. Gautier and Z. Xia, *Adv. Mater.*, 2022, **34**, 2201887.
- 2 Y. Wang, Z. Wang, G. Wei, Y. Yang, S. He, J. Li, Y. Shi, R. Li, J. Zhang and P. Li, *Chem. Eng. J.*, 2022, **437**, 135346.
